# Supplementary material
Source: PubMed Central journal article supplement (PMC3230515)

## Supplemental Figure Legends

**Figure S1 Time course of p53 and Chk2 phosphorylation in response to BrdU photolysis.** (A) U87 cells were exposed to BrdU photolysis (UV-A dose of 1500 J/m<sup>2</sup>) and cells collected for western blot analysis at the indicated times.  $\beta$ -actin denotes equal loading. (B) Densitometric analysis of (A) presented in graph form. *Data points*, fold changes in phosphorylation levels over time compared to control (no UV-A) after normalization to  $\beta$ -actin expression.

**Figure S2 H2AX phosphorylation levels correlate with increasing DSBs.** (A) U87 cells were exposed to BrdU photolysis with increasing doses of UV-A (no UV-A, lane 1; 125 J/m<sup>2</sup>, lane 2; 250 J/m<sup>2</sup>, lane 3, 500 J/m<sup>2</sup>, lane 4; 750 J/m<sup>2</sup>, lane 5; 1000 J/m<sup>2</sup>, lane 6; 1250 J/m<sup>2</sup>, lane 7; and 1500 J/m<sup>2</sup>, lane 8), and collected after 1 h for western blotting.  $\beta$ -actin denotes equal loading. (B) Densitometric analysis of (A) presented in graph form. *Data points*, fold changes in phosphorylation levels over time compared to control (no UV-A) after normalization to  $\beta$ -actin expression.

**Figure S3 BrdU photolysis activates ATM.** U87 cells were exposed to BrdU photolysis with increases doses of UV-A (0, 50, or 150 J/m<sup>2</sup>). Cells were collected 3 h after irradiation and processed for western blotting with anti-(pS1981) ATM antibody. Parallel samples were immunoprecipitated with anti-ATM antibody prior to western blotting to confirm equal ATM expression levels.

**Figure S4 BrdU-induced p53 and H2AX phosphorylation in MCF-7 cells.** MCF-7 cells were exposed to BrdU photolysis with various doses of UV-A ([150 J/m<sup>2</sup> (lanes 1, 4, 7); 500 J/m<sup>2</sup> (lanes 2, 5, and 8); 1500 J/m<sup>2</sup> (3, 6, and 9); no UV-A (lane 10)]. Cells were collected at the indicated times and processed for western blotting.  $\beta$ -actin was used for normalization.

**Figure S5 ERK phosphorylation is bi-phasic in response to DSBs and independent of p53. (A)** U87 cells were exposed to BrdU photolysis with increasing doses of UV-A [0 J/m<sup>2</sup> (lane 1); 15 J/m<sup>2</sup> (lane 2); 50 J/m<sup>2</sup> (lane 3); 150 J/m<sup>2</sup> (lane 4); 500 J/m<sup>2</sup> (lane 5); and 1500 J/m<sup>2</sup> (lane 6)]. Cells were collected after 3 h for western blotting.  $\beta$ -actin denotes equal loading. **(B)** Densitometric analysis of (A) presented in graph form. *Data points*, fold changes in phosphorylation compared to control (no UV-A) after normalization to  $\beta$ -actin expression plotted against UV-A dose.

**Figure S6 BrdU photolysis activates ERK via MEK. (A)** U87 cells were treated with U0126 at 5  $\mu$ M (lanes 4-6), or not (lanes 1-3) 30 min prior to BrdU photolysis with increasing doses of UV-A (Lanes 1 and 4, 0 J/m<sup>2</sup>; 2 and 5, 50 J/m<sup>2</sup>; 3 and 6, 150 J/m<sup>2</sup>). Cells were collected 3 h after UV-A radiation for western blot analysis. ERK denotes equal loading. Figure shows representative images of triplicate repeats. **(B)** Densitometric analysis of (A) presented in graph form. *Data points*, ERK phosphorylation levels. *Error bars*, SEM; n = 3. Fold (x) denotes changes in p-ERK levels compared to control (no UV-A) normalization to ERK. \*, p < 0.05.

**Figure S7** EcoRI-induced DSBs activate  $\gamma$ -H2AX in a time and dose-dependent manner. **(A)** HEK293 were electroporated with either buffer alone (lane 1- 4) or buffer with increasing units of EcoRI enzyme (10 units, lane 5-8; 50 units, lane 9-12; or 200 units, lane 13-16). Cells were collected at 2, 10, 30, and 60 min for western blotting analysis. ERK denotes equal loading. **(B)** Densitometric analysis of (A) presented in graph form. *Data points*, fold changes in  $\gamma$ -H2AX over time compared to control (no EcoRI) after normalization to ERK.

**A**

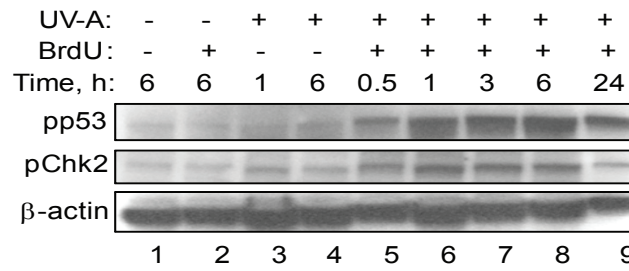

**B**

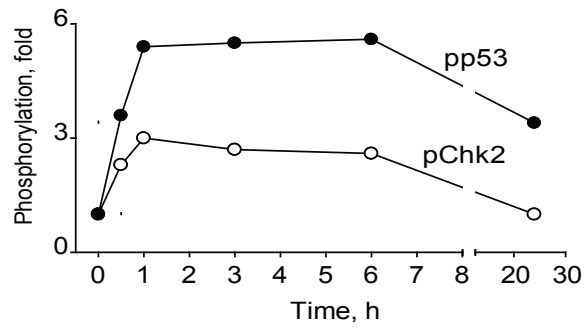

A

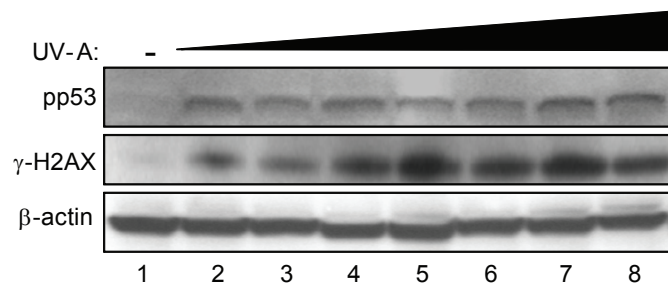

B

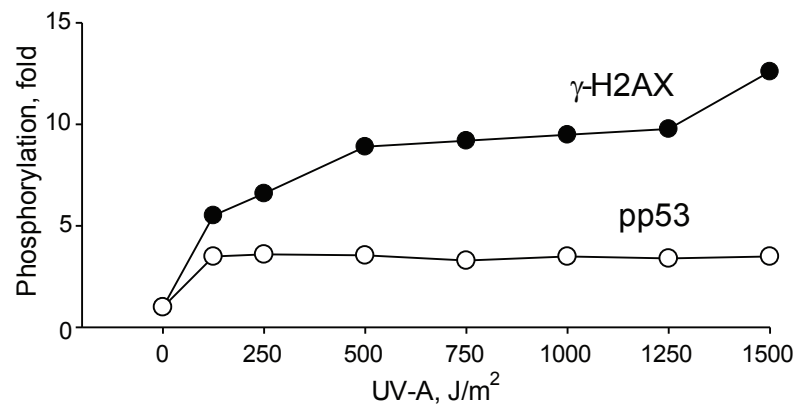

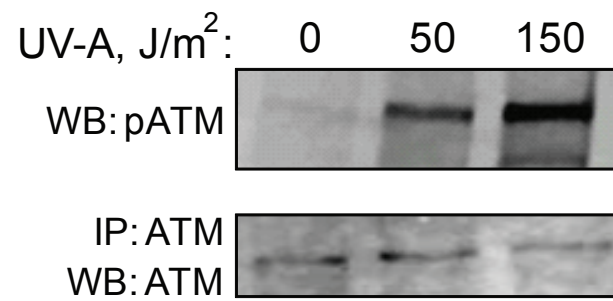

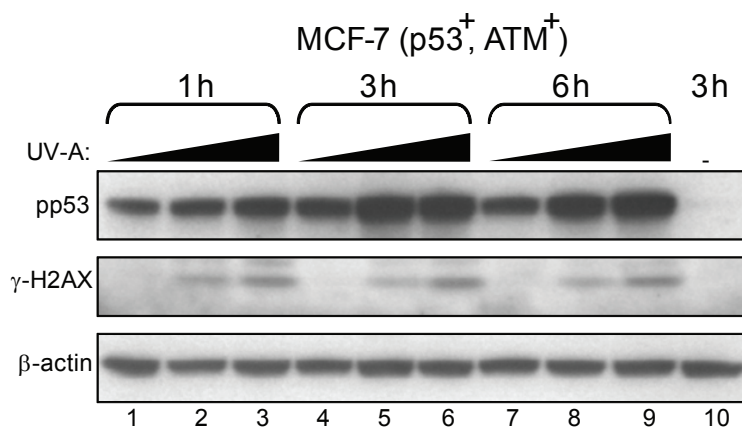

A

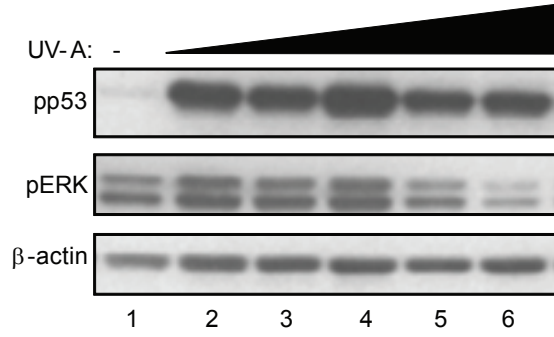

B

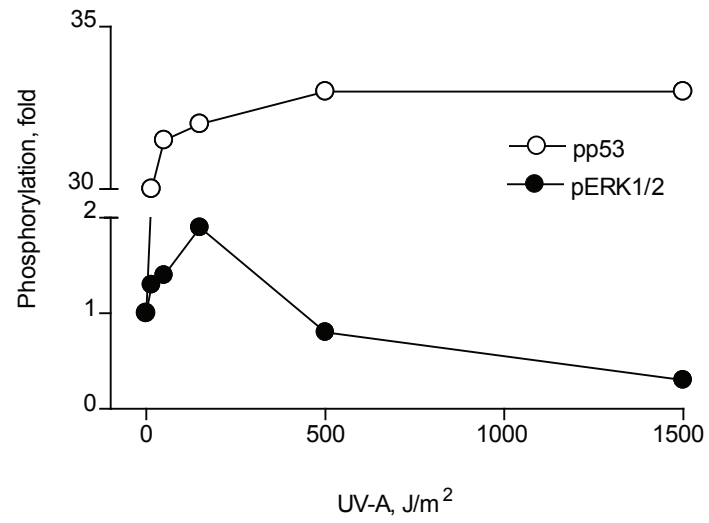

Khalil at al., Supplemental Fig. S5.



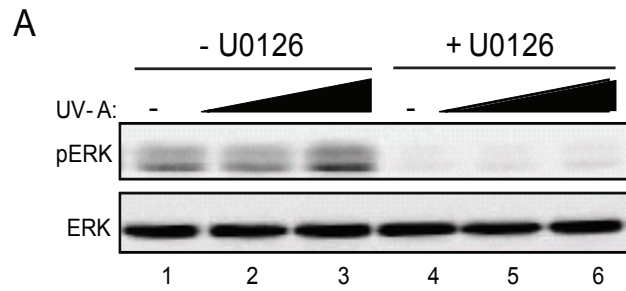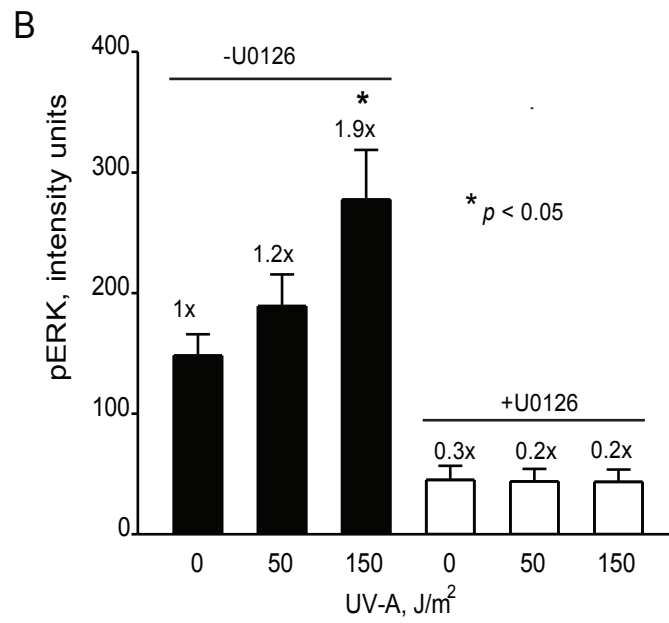

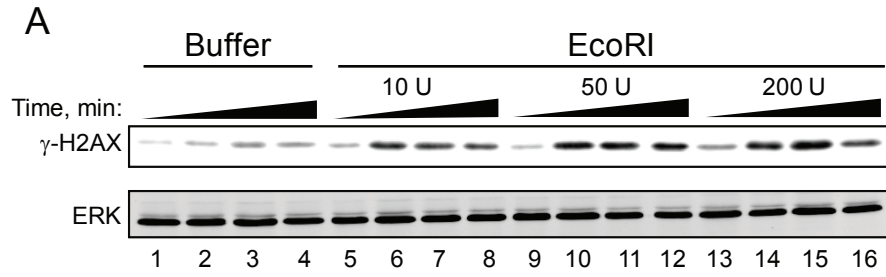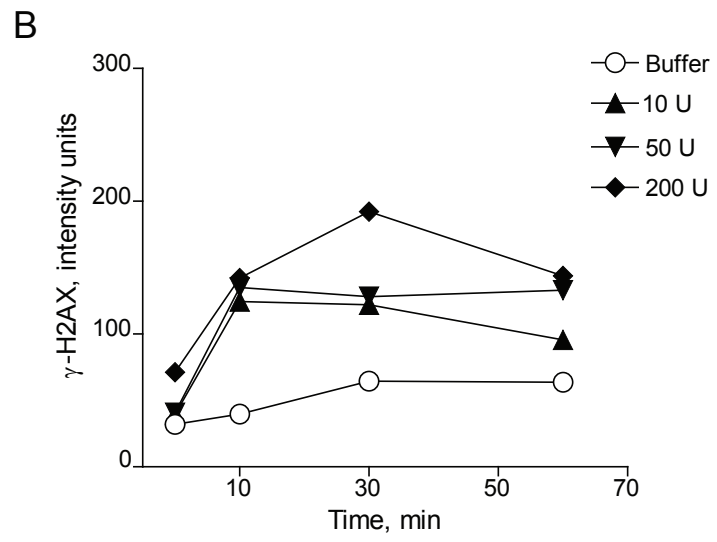

Supplement: cc1003_0481SD1.pdf [file cc1003_0481SD1.pdf]
